# Supplementary material
Source: PubMed Central journal article supplement (PMC5478475)
Supplement: NIHMS842376-supplement-1.pdf [file NIHMS842376-supplement-1.pdf]

## **Supplemental Information**

### **Cell autonomous ANTXR1-mediated regulation of extracellular matrix components in primary fibroblasts**

Kai Hu<sup>1</sup>, Bjorn R. Olsen<sup>1,3</sup>, and Tatiana Y. Besschetnova<sup>1,3,\*</sup>

<sup>1</sup>Department of Developmental Biology, Harvard School of Dental Medicine, Boston MA

<sup>2</sup>Department of Cell Biology, Harvard Medical School

<sup>3</sup>Department of Oral and Maxillofacial Surgery/Skeletal Biology Research Center,  
Massachusetts General Hospital and Harvard School of Dental Medicine, Boston MA

<sup>3</sup>Present address

\*Correspondence and request for material should be addressed to T.Y.B.

([Tatiana\\_Besschetnova@hms.harvard.edu](mailto:Tatiana_Besschetnova@hms.harvard.edu))

Massachusetts General Hospital,

Department of Oral and Maxillofacial Surgery/Skeletal Biology Research Center

50 Blossom Street, Their 513A

Boston, MA, 02114, USA

**Phone: +1(617) 726-3863**
