# Supplementary material
Source: PubMed Central journal article supplement (PMC5478475)
Supplement: NIHMS842376-supplement-3.pdf [file NIHMS842376-supplement-3.pdf]

## Supplemental Data: Figure Legends

**Supplemental Fig. S1.** Loss of ANTXR1 leads to increased Hif1- $\alpha$  in P49 fibroblasts.

(A) Bar graphs show average transcript levels of FG2 (fold increase) in lysates of P49 of control (*wt*) and *Antxr1* null (*ko*) fibroblasts treated with vehicle - or sv1- containing transfection complex (*ko/sv1*). (\* $P < 0.05$ ; *ns*-not statistically significant,  $n = 4$  per each group). (B) Representative immunofluorescence images of Hif1- $\alpha$  -, stained P49 *wt*, *ko* and *ko/sv1* fibroblasts (green; scale bar 50  $\mu\text{m}$ ). Nuclei (blue) were stained with Hoechst 33342 fluorescent dye.
