# Supplementary material
Source: PubMed Central journal article supplement (PMC5478475)

## **Supplemental Information**

### **Cell autonomous VEGF-mediated regulation of extracellular matrix components in *Antxr1*-deficient fibroblasts**

Kai Hu<sup>1</sup>, Bjorn R. Olsen<sup>1,2</sup>, and Tatiana Y. Besschetnova<sup>1,\*</sup>

<sup>1</sup>Department of Developmental Biology, Harvard School of Dental Medicine, Boston MA

<sup>2</sup>Department of Cell Biology, Harvard Medical School

## **Supplemental Data: Figure Legends**

**Supplemental Figure S1.** Increased ECM accumulation in *Antxr1* null mice. (A) Fibroblasts isolated from control animals stained against ANTXR1 antibody (green) (scale bars 50  $\mu\text{m}$ ). (B) Skin sections (7  $\mu\text{m}$ ) of control and mutant mice stained with collagen type 1 and fibronectin antibodies (red; (scale bars 250  $\mu\text{m}$ ). Nuclei (blue) were stained with Hoechst 33342 fluorescent dye.

**Supplemental Figure S2.** Loss of ANTXR1 leads to increased VEGF-dependent signaling. (A) Bar graphs show average transcript levels (fold increase) in lysates of control and mutant cells at E17.5. ( $*P < 0.05$  n = 4) (B) Representative immunofluorescence images of VEGF-, VEGFR2- and VEGFR1- stained P49 fibroblasts (green; scale bar 50  $\mu\text{m}$ ).

**Supplemental Data:**

Supplemental Figure S1

A

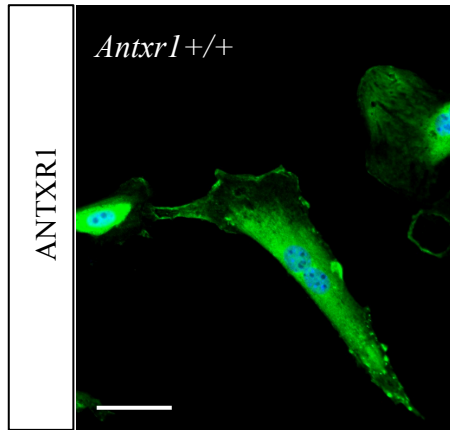

B

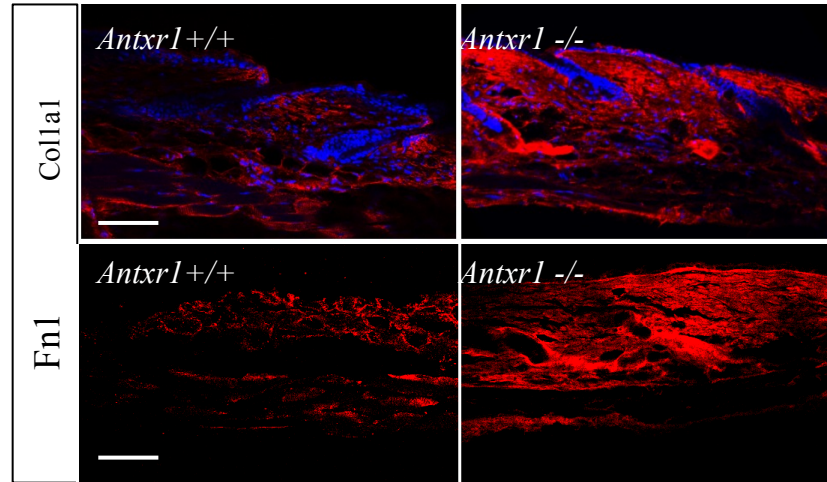

Supplemental Figure S2

E17.5

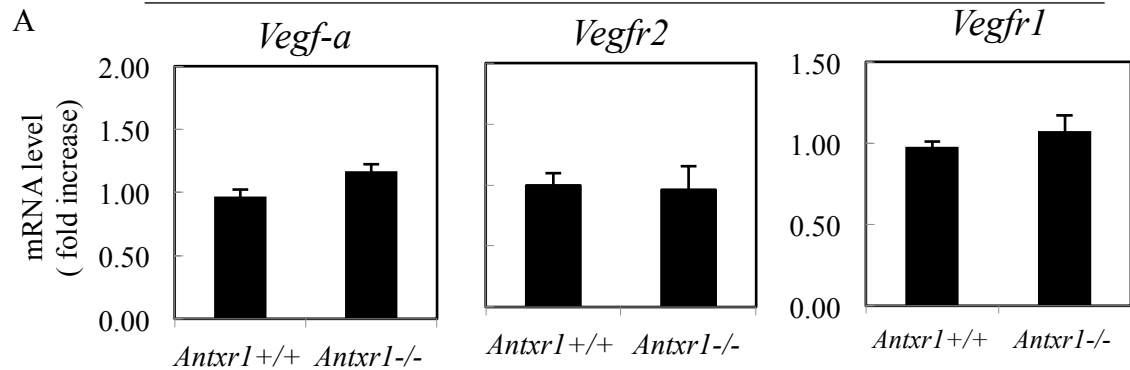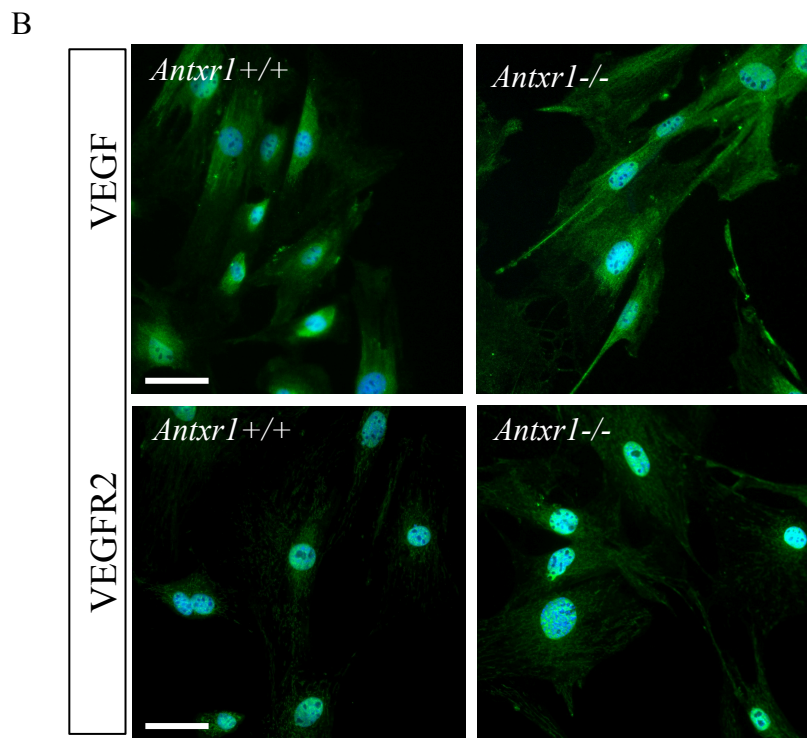

Supplement: NIHMS842376-supplement-4.pdf [file NIHMS842376-supplement-4.pdf]
