# Supplementary material
Source: PubMed Central journal article supplement (PMC5478475)

## Supplemental Data:

### Supplemental Figure S1

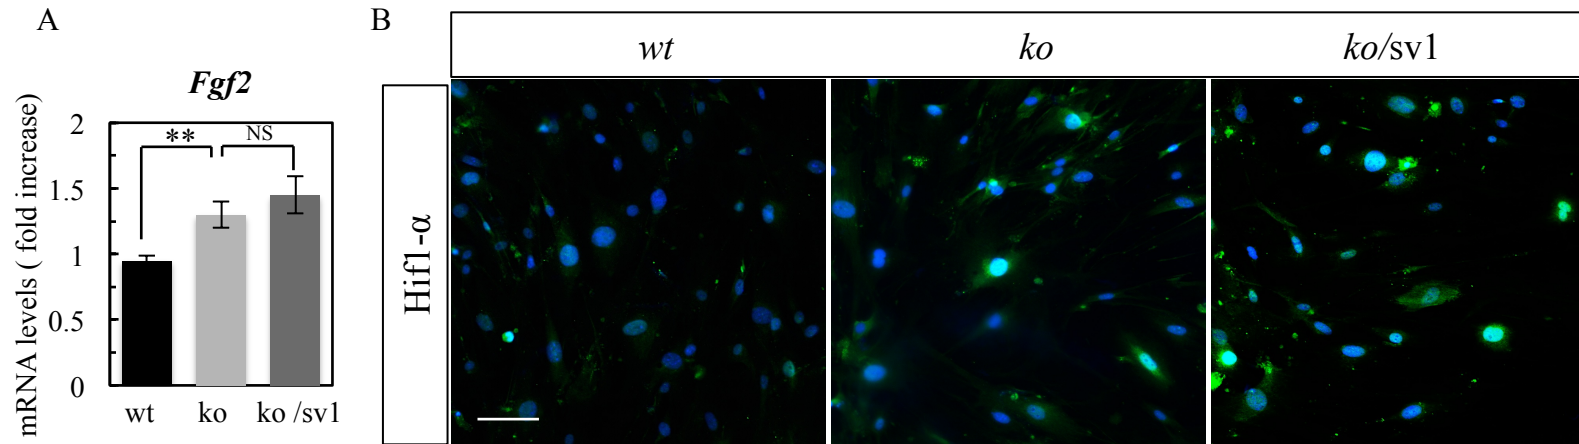

Supplement: NIHMS842376-supplement-2.pdf [file NIHMS842376-supplement-2.pdf]
